# Supplementary material
Source: PubMed Central journal article supplement (PMC5743036)
Supplement: Supp_Figure1.pdf [file Supp_Figure1.pdf]

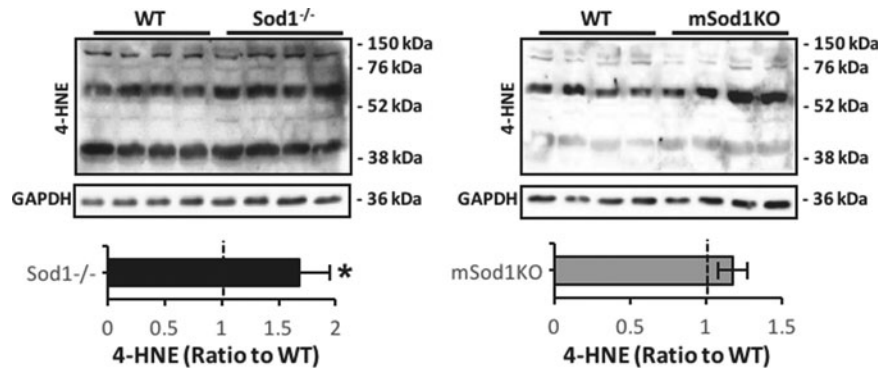

**SUPPLEMENTARY FIG. S1.** Immunoblots (*top panel*) and quantification (*bottom panel*) of 4-HNE protein adducts in AT lysates of *Sod1*<sup>-/-</sup> (*left panel*), *mSod1KO* (*right panel*), and the respective *WT* mice. \* $p < 0.05$  compared with values from the respective *WT* mice. 4-HNE, 4-hydroxynonenal; AT, anterior tibialis; *WT*, wild type.
