# Supplementary material
Source: PubMed Central journal article supplement (PMC5743036)
Supplement: Supp_Figure2.pdf [file Supp_Figure2.pdf]

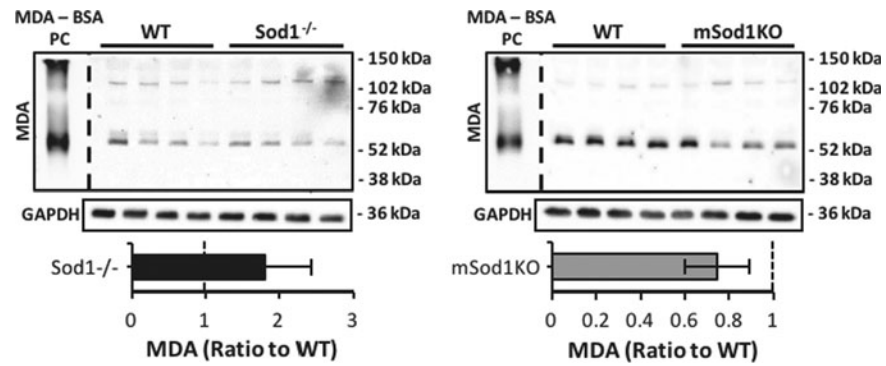

**SUPPLEMENTARY FIG. S2.** Western blot analysis (*top panel*) and quantification (*bottom panel*) of MDA content in AT lysates of *Sod1*<sup>-/-</sup> (*left panel*), *mSod1KO* (*right panel*), and the respective WT mice. PC included MDA-BSA (10 ng). MDA, malondialdehyde; MDA-BSA, bovine serum albumin conjugated MDA; PC, positive control.
