# Supplementary material
Source: PubMed Central journal article supplement (PMC5743036)
Supplement: Supp_Figure3.pdf [file Supp_Figure3.pdf]

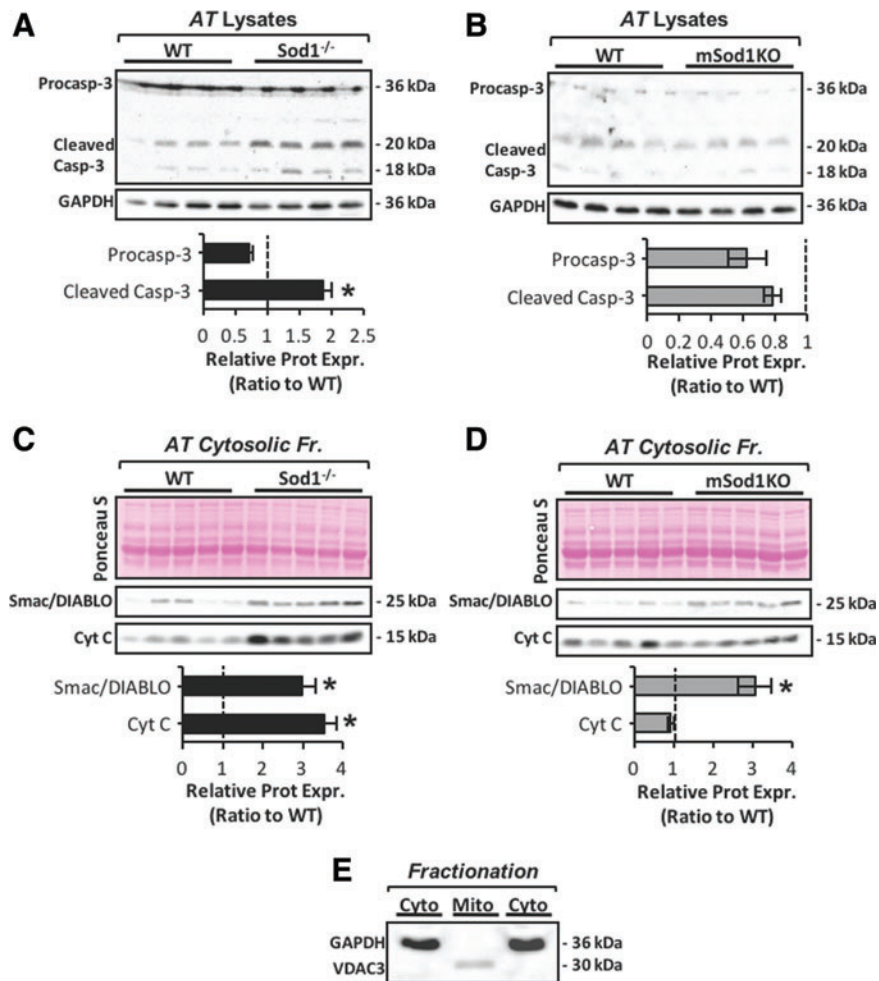

**SUPPLEMENTARY FIG. S3. Mitochondria-mediated apoptotic potential in skeletal muscle of *Sod1<sup>-/-</sup>* and *mSod1KO* genotypes.** (A, B) Western blot analysis (top panel) and quantification (bottom panel) of procaspase-3 and cleaved caspase-3 in AT lysates of *Sod1<sup>-/-</sup>* (A), *mSod1KO* (B), and the respective WT mice. \* $p < 0.05$  compared with values from the respective WT mice. (C, D) Western blots of isolated cytosolic fractions from *Sod1<sup>-/-</sup>* (C), *mSod1KO* (D), and the respective WT mice, immunodetected for Cyt C and Smac/DIABLO mitochondrial proapoptotic proteins (middle panel), and densitometric quantification of the blots (bottom panel). The intensity of the bands shown in the Ponceau S-stained gel (top panel) was used as a loading control. (E) Example Western blot of voltage-dependent anion channel 3 (VDAC3) and GAPDH content to illustrate the purity of the extracted Mito and Cyto skeletal muscle fractions. \* $p < 0.05$  compared with values from the respective WT mice. Cyto, cytochrome c; Cyto, cytosolic; Mito, mitochondrial.
