# Supplementary material
Source: PubMed Central journal article supplement (PMC5743036)
Supplement: Supp_Figure4.pdf [file Supp_Figure4.pdf]

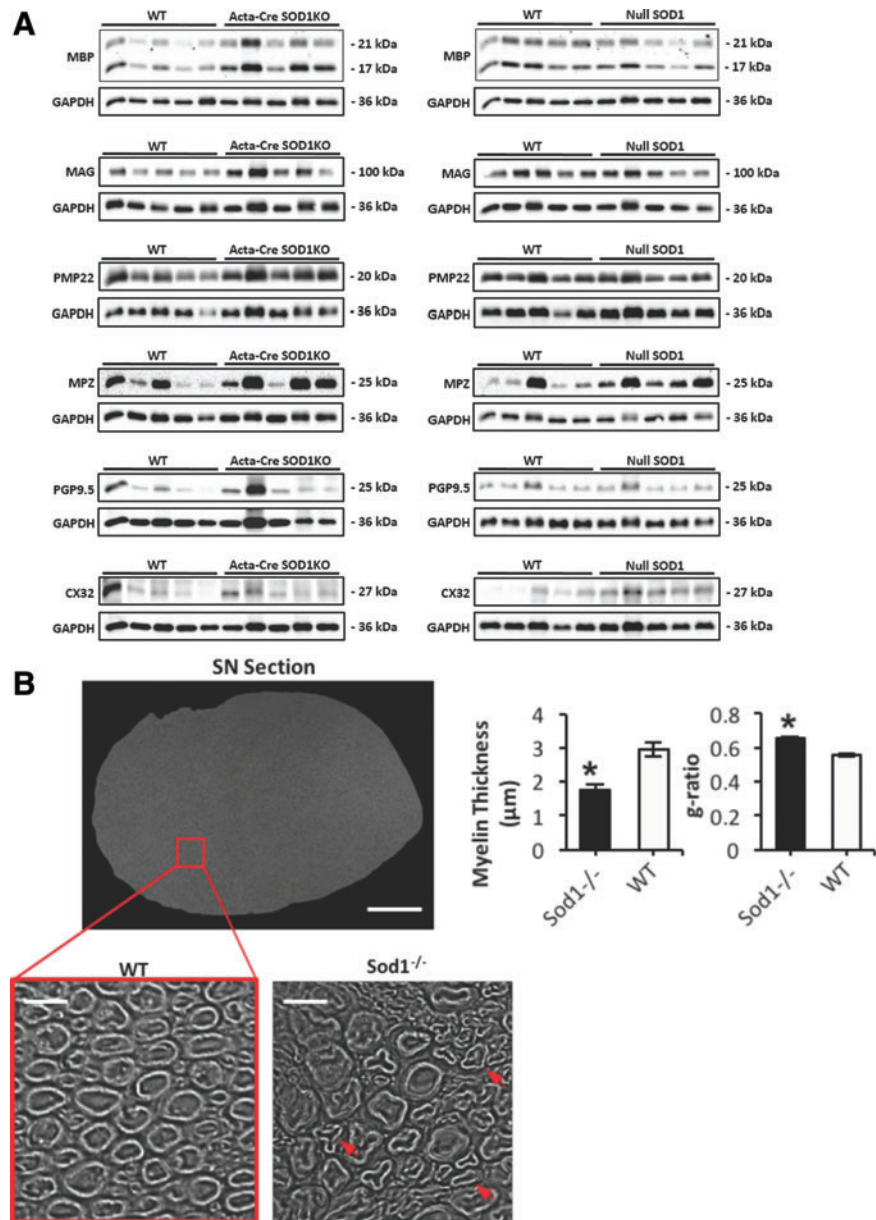

**SUPPLEMENTARY FIG. S4. Myelination of peripheral nerve (SN) from *Sod1*<sup>-/-</sup> and *mSod1KO* genotypes. (A)** Myelin blots with their respective loading controls. **(B)** Transverse section of a SN from a WT (*Sod1*<sup>+/+</sup>) mouse (top panel). 20×original magnification. Scale bar, 100 µm; bottom left panel shows enlarged area marked by red box in the top panel to show the morphology and myelin thickness of motor axons of the peripheral nerve. 60×original magnification. Scale bar, 10 µm; transverse section of an SN from an *Sod1*<sup>-/-</sup> mouse (bottom right panel). Note reduced myelin thickness of motor axons from peripheral nerve of the *Sod1*<sup>-/-</sup> model, indicated by arrowheads. 60×original magnification. Scale bar, 10 µm; myelin thickness and g-ratio quantifications (right panel) of peripheral nerve from *Sod1*<sup>-/-</sup> and the respective WT mice, \**p*<0.05 compared with values from the respective WT mice, *n*=3 mice/strain. SN, sciatic nerve.

#### Label Free LC-MS Analysis

#### MS Data Analysis and Search Parameters

#### Result Filtration Parameters.

|                           |                   |
|---------------------------|-------------------|
| Retention Time            | ≥0                |
| Retention Time            | ≤110              |
| Feature Fold Change       | ≥1                |
| Quality                   | ≥1                |
| Average Area              | ≥0                |
| Charge                    | ≥1                |
| Charge                    | ≤10               |
| Confident Sample Number   | ≥1                |
| With Peptide ID           | True              |
| Normalization             | Total Ion current |
| Protein Significance      | ≥20               |
| Confident Unique Supports | ≥1                |
