# Supplementary material
Source: PubMed Central journal article supplement (PMC5743036)
Supplement: Supp_Figure6.pdf [file Supp_Figure6.pdf]

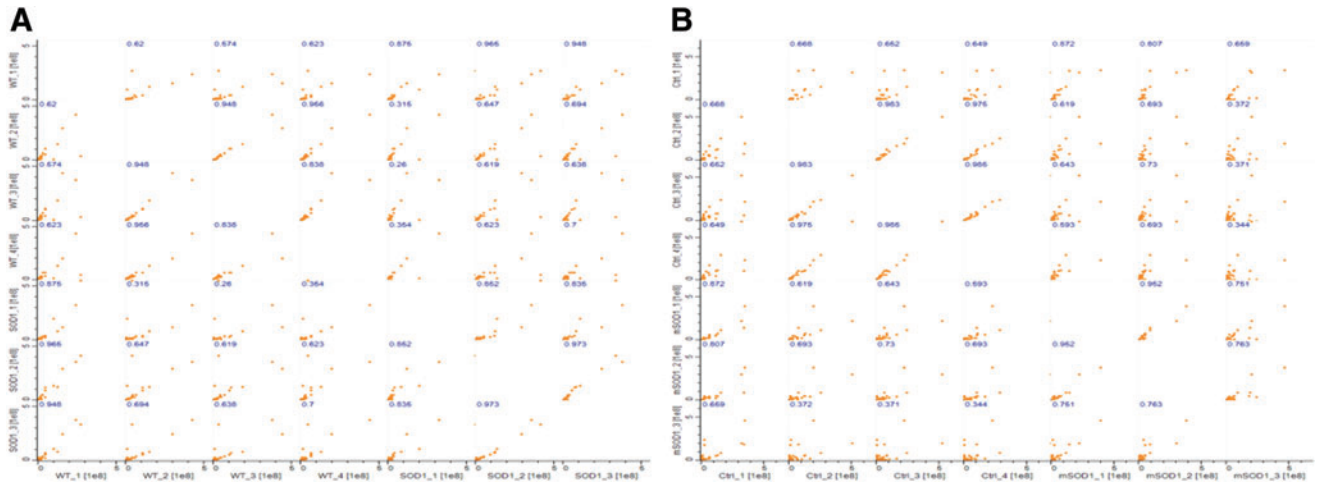

**SUPPLEMENTARY FIG. S6. (A, B) Multiscatter plots using the label-free quantification data to estimate degree of correlation between the different samples of SN from *Sod1*<sup>-/-</sup> (A), *mSod1KO* (B), and the respective WT mice. R<sup>2</sup> correlation values are included for each comparison.**
