# Supplementary material
Source: PubMed Central journal article supplement (PMC5743036)
Supplement: Supp_Table1.pdf [file Supp_Table1.pdf]

SUPPLEMENTARY TABLE S1. LIST OF ANTIBODIES USED FOR WESTERN BLOTTING

| <i>Primary antibody</i> | <i>Manufacturer</i> | <i>Dilution</i> | <i>Primary antibody</i>        | <i>Manufacturer</i> | <i>Dilution</i> |
|-------------------------|---------------------|-----------------|--------------------------------|---------------------|-----------------|
| 3-NT                    | Cell Biolabs        | 1:2000          | P-I $\kappa$ B- $\alpha$       | Abcam               | 1:1000          |
| 4-HNE                   | Abcam               | 1:2000          | P-P65                          | Abcam               | 1:1000          |
| Calpain I               | Abcam               | 1:1000          | P65                            | Abcam               | 1:1000          |
| Calpastatin             | Abcam               | 1:1000          | PGP9.5                         | Abcam               | 1:1000          |
| Casp-3 (pro/cleaved)    | Abcam               | 1:1000          | PMP22                          | Abcam               | 1:1000          |
| CAT                     | Abcam               | 1:5000          | PRXI                           | Abcam               | 1:500           |
| CX32                    | Abcam               | 1:1000          | PRXII                          | Abcam               | 1:500           |
| Cyt C                   | Abcam               | 1:10,000        | PRXIII                         | Abcam               | 1:2000          |
| eNOS                    | Abcam               | 1:1000          | PRXIV                          | Abcam               | 1:1000          |
| GAPDH                   | Abcam               | 1:30,000        | PRXV                           | Abcam               | 1:1000          |
| GPX1                    | Abcam               | 1:1000          | PRXV                           | Abcam               | 1:1000          |
| HSC70                   | Cell Signaling      | 1:1000          | PRXVI                          | Abcam               | 1:1000          |
| HSP10                   | Abcam               | 1:5000          | Smac/DIABLO                    | BD                  | 1:1000          |
| HSP25                   | Cell Signaling      | 1:2500          | SOD1                           | Cell Signaling      | 1:2000          |
| HSP60                   | Cell Signaling      | 1:5000          | SOD2                           | Cell Signaling      | 1:2000          |
| I $\kappa$ B- $\alpha$  | Abcam               | 1:1000          | Ubiquitin                      | Abcam               | 1:2000          |
| MAG                     | Abcam               | 1:1000          | VDAC3                          | ThermoFisher        | 1:1000          |
| MBP                     | Abcam               | 1:1000          | $\alpha$ -proteasomal subunits | Abcam               | 1:2000          |
| MDA                     | Cell Biolabs        | 1:2000          | $\beta$ 1-proteasomal subunit  | Santa Cruz          | 1:1000          |
| MPZ                     | Abcam               | 1:1000          | $\beta$ 2-proteasomal subunit  | Enzo                | 1:1000          |
| OGG1                    | Abcam               | 1:1000          | $\beta$ 5-proteasomal subunit  | Abnova              | 1:1000          |

3-NT, 3-nitrotyrosine; 4-HNE, 4-hydroxynonenal; CAT, catalase; CX32, connexin 32/GJB1; Cyt C, cytochrome c; eNOS, endothelial nitric oxide synthase; GAPDH, glyceraldehyde 3-phosphate dehydrogenase; GPX1, glutathione peroxidase 1; MAG, myelin-associated glycoprotein; MBP, myelin basic protein; MDA, malondialdehyde; MPZ, myelin protein zero; OGG1, oxoguanine DNA glycosylase; PGP9.5, protein gene product 9.5; PMP22, peripheral myelin protein 22; SOD, superoxide dismutase.
